# Supplementary material
Source: HighWire-hosted journal article supplement (https://bmjopen.bmj.com/content/14/1/e080043)
Supplement: inline-supplementary-material-1 [file inline-supplementary-material-1.pdf]

## Supplement File of search strategy

### Filters:

There will be no temporal restriction other than the studies being included up until the search date. Studies published in English will be included.

### Scopus search strategy:

```
( robot* W/3 ( surg* OR procedure* OR resection* OR exent* OR "beyond TME" OR "beyond total mesorectal excision*" ) ) ) AND ( TITLE-ABS-KEY ( ( colorectal* OR rectal* OR rectum* OR rectosigmoid* ) W/3 ( cancer* OR carcinoma* OR adenocarcinoma* OR tumor* OR tumour* OR neoplas* OR malignan* ) ) )
```

### Medline search strategy:

- 1 (robot\* adj3 (surg\* or procedure\* or resection\* or exent\* or beyond TME or beyond total mesorectal excision\*)).mp. [mp=title, book title, abstract, original title, name of substance word, subject heading word, floating sub-heading word, keyword heading word, organism supplementary concept word, protocol supplementary concept word, rare disease supplementary concept word, unique identifier, synonyms, population supplementary concept word, anatomy supplementary concept word]
- 2 exp pelvic exenteration/ or exp robotic surgical procedures/
- 3 1 or 2
- 4 ((colorectal or rectal or rectum) adj3 (cancer\* or carcinoma\* or adenocarcinoma\* or tumor\* or tumour\* or neoplas\* or malignan\*)).mp. [mp=title, book title, abstract, original title, name of substance word, subject heading word, floating sub-heading word, keyword heading word, organism supplementary concept word, protocol supplementary concept word, rare disease supplementary concept word, unique identifier, synonyms, population supplementary concept word, anatomy supplementary concept word]
- 5 colorectal neoplasms/ or exp colorectal neoplasms, hereditary nonpolyposis/ or exp rectal neoplasms/
- 6 4 or 5
- 7 3 and 6

### EMBASE search strategy:

- 1 (robot\* adj3 (surg\* or procedure\* or resection\* or exent\* or beyond TME or beyond total mesorectal excision\*)).mp. [mp=title, abstract, heading word, drug trade name, original title, device manufacturer, drug manufacturer, device trade name, keyword heading word, floating subheading word, candidate term word]
- 2 exp \*pelvis exenteration/
- 3 \*robot assisted surgery/
- 4 1 or 2 or 3

5 ((colorectal\* or rectal\* or rectum\* or rectosigmoid\*) adj3 (cancer\* or carcinoma\* or adenocarcinoma\* or tumor\* or tumour\* or neoplas\* or malignan\*)).mp. [mp=title, abstract, heading word, drug trade name, original title, device manufacturer, drug manufacturer, device trade name, keyword heading word, floating subheading word, candidate term word]

6 \*colorectal cancer/ or exp \*colorectal carcinoma/ or exp \*hereditary colorectal cancer/ or exp \*rectosigmoid cancer/ or exp \*rectum cancer/

7 5 or 6

8 4 and 7

### Prospero search

Website: <https://www.crd.york.ac.uk/prospero/#searchadvanced>

Search: robotic and locally advanced or recurrent rectal cancer

### Clinical trials search

Website: <https://classic.clinicaltrials.gov/ct2/search/advanced>

Search:

Condition or disease: locally advanced or recurrent rectal cancer

Other terms: robotic
